# Supplementary material
Source: PubMed Central journal article supplement (PMC4283411)
Supplement: embj0033-2547-sd9.pdf [file embj0033-2547-sd9.pdf]

**Table S1.** Thermodynamic parameters of *ctfF5B(517-858)* binding to GTP $\gamma$ S, GDPNP

and GDP at different temperatures.

| Ligand         | T<br>[°C] | K <sub>d</sub><br>[ $\mu$ M] | $\Delta$ H<br>[kcal/mol] | $\Delta$ G<br>[kcal/mol] | T $\Delta$ S<br>[kcal/mol] |
|----------------|-----------|------------------------------|--------------------------|--------------------------|----------------------------|
| GTP $\gamma$ S | 10        |                              |                          | -8.06                    |                            |
|                |           | 0.58                         | -5.06                    |                          | 3.0                        |
| GTP $\gamma$ S | 20        |                              |                          | -8.27                    |                            |
|                |           | 0.67                         | -9.67                    |                          | -1.4                       |
| GTP $\gamma$ S | 25        |                              |                          | -8.83                    |                            |
|                |           | 0.82                         | -12.93                   |                          | -4.1                       |
| GTP $\gamma$ S | 30        |                              |                          | -8.41                    |                            |
|                |           | 0.92                         | -15.81                   |                          | -7.4                       |
| GDPNP          | 10        | 10.67                        | -5.89                    | -6.44                    | 0.55                       |
| GDPNP          | 15        | 12.3                         | -7.31                    | -6.48                    | -0.83                      |
| GDPNP          | 20        | 15.47                        | -8.09                    | -6.49                    | -1.6                       |
| GDPNP          | 25        | 15.0                         | -9.58                    | -6.68                    | -2.9                       |
| GDPNP          | 30        | 20.8                         | -9.67                    | -6.47                    | -3.2                       |
| GDP            | 10        | 3.37                         | -6.94                    | -7.09                    | 0.15                       |
|                | 20        | 5.85                         | -9.06                    | -7.76                    | -2.3                       |
|                | 30        | 10.4                         | -11.51                   | -6.91                    | -4.6                       |

Measurements were performed two to three times.

K<sub>d</sub>, dissociation equilibrium constant; calculated as 1/K<sub>a</sub>.K<sub>a</sub>, association equilibrium constant; standard deviation did not exceed  $\pm$ 15%. $\Delta$ H, standard enthalpy change; standard deviation did not exceed  $\pm$ 15%.

---

$\Delta G$ , Gibbs energy; calculated from equation  $\Delta G = -R \cdot T \cdot \ln K_a$ .

$T\Delta S$ , standard entropy change; calculated from equation  $\Delta G = \Delta H - T\Delta S$ .
