# Supplementary material
Source: PubMed Central journal article supplement (PMC4283411)
Supplement: embj0033-2547-sd10.pdf [file embj0033-2547-sd10.pdf]

**Table S2.** Crystallization, X-ray data collection and refinement statistics for structures of eIF5B(517-858) mutants

|                                           | eIF5B(517-858)D533A-GTPγS                                                       | eIF5B(517-858)D533R-GTPγS                                                      | eIF5B(517-858)D533N-GTP·Na <sup>+</sup>                                         |
|-------------------------------------------|---------------------------------------------------------------------------------|--------------------------------------------------------------------------------|---------------------------------------------------------------------------------|
| <b>Crystallization</b>                    |                                                                                 |                                                                                |                                                                                 |
| Condition                                 | 100 mM HEPES (pH 7.3), 15% PEG 4000, 150 mM NaOAc                               | 100 mM MES (pH 6.7), 13% PEG 8000, 225 mM NaOAc                                | 100 mM HEPES (pH 7), 13% PEG 4000, 125 mM NaOAc                                 |
| Temperature (°C)                          | 20                                                                              | 20                                                                             | 20                                                                              |
| <b>Data Collection</b>                    |                                                                                 |                                                                                |                                                                                 |
| Space Group                               | P2 <sub>1</sub>                                                                 | P4 <sub>1</sub> 2 <sub>1</sub> 2                                               | P2 <sub>1</sub>                                                                 |
| Unit Cell                                 | a = 55.6 Å<br>b = 115.8 Å<br>c = 65.9 Å<br><br>α = 90°<br>β = 102.3°<br>γ = 90° | a = 115.7 Å<br>b = 115.7 Å<br>c = 119.8 Å<br><br>α = 90°<br>β = 90°<br>γ = 90° | a = 55.4 Å<br>b = 115.9 Å<br>c = 66.1 Å<br><br>α = 90°<br>β = 101.4°<br>γ = 90° |
| Molecules/asym. unit                      | 2                                                                               | 2                                                                              | 2                                                                               |
| Resolution (Å)                            | 1.58 (1.68-1.58)                                                                | 2.75 (2.92-2.75)                                                               | 1.5 (1.59-1.5)                                                                  |
| Observed reflections                      | 374970 (60270)                                                                  | 154138 (23582)                                                                 | 542902 (84681)                                                                  |
| Unique reflections                        | 110416 (17665)                                                                  | 21704 (3403)                                                                   | 131458 (20989)                                                                  |
| Completeness (%)                          | 98.8 (98.0)                                                                     | 99.8 (99.1)                                                                    | 99.2 (98.2)                                                                     |
| <I>/σ                                     | 17.7 (2.2)                                                                      | 19.35 (3.11)                                                                   | 24.4 (2.9)                                                                      |
| R <sub>sym</sub> (%)                      | 3.9 (51.5)                                                                      | 7.8 (56.8)                                                                     | 3.0 (46.3)                                                                      |
| CC(1/2) (%)                               | 99.9 (73.9)                                                                     | 99.9 (86.1)                                                                    | 100 (82.8)                                                                      |
| <b>Refinement</b>                         |                                                                                 |                                                                                |                                                                                 |
| R <sub>work</sub> (%)                     | 16.9                                                                            | 20.6                                                                           | 15.5                                                                            |
| R <sub>free</sub> (%)                     | 19.4                                                                            | 25.7                                                                           | 18.2                                                                            |
| <b>Rmsd from Standard Stereochemistry</b> |                                                                                 |                                                                                |                                                                                 |
| Bond length (Å)                           | 0.012                                                                           | 0.005                                                                          | 0.014                                                                           |
| Bond angles (°)                           | 1.5                                                                             | 1.0                                                                            | 1.6                                                                             |
| <b>Ramachandran Plot Statistics</b>       |                                                                                 |                                                                                |                                                                                 |
| Most favored (%)                          | 98.7                                                                            | 98.2                                                                           | 98.5                                                                            |
| Allowed regions (%)                       | 1.3                                                                             | 1.8                                                                            | 1.5                                                                             |
| Disallowed regions (%)                    | 0                                                                               | 0                                                                              | 0                                                                               |

Values in parentheses refer to the highest resolution shell.

R<sub>work</sub> and R<sub>free</sub> factors are calculated using the formula  $R = \frac{\sum_{hkl} ||F(obs)_{hkl}| - |F(calc)_{hkl}||}{\sum_{hkl} |F(obs)_{hkl}|}$ , where F(obs)<sub>hkl</sub> and F(calc)<sub>hkl</sub> are observed and measured structure factors, respectively. R<sub>work</sub> and R<sub>free</sub> differ in the set of reflections they are calculated from: R<sub>free</sub> is calculated for the test set, whereas R<sub>work</sub> is calculated for the working set.
