# Supplementary material
Source: PubMed Central journal article supplement (PMC4283411)

A

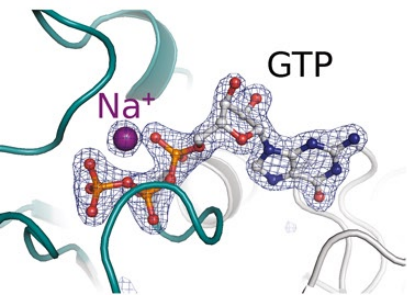

B

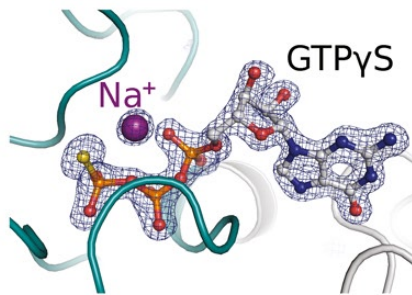

C

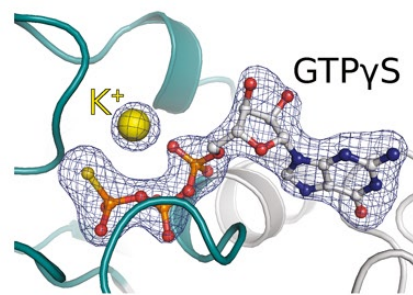

D

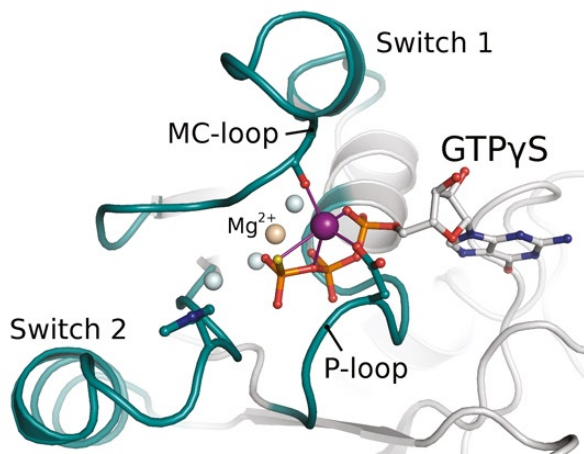

E

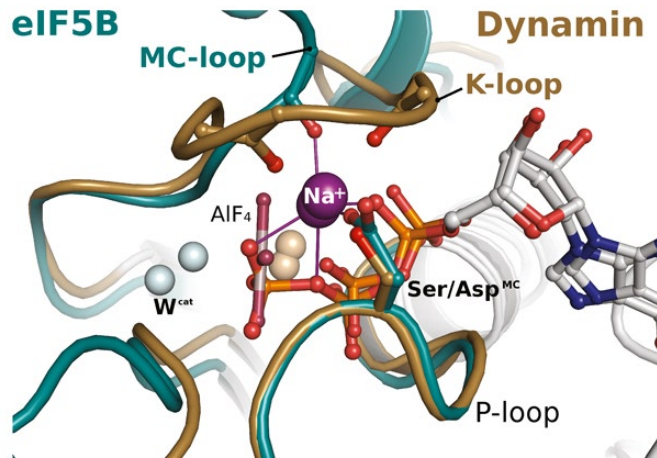

Supplement: embj0033-2547-sd2.pdf [file embj0033-2547-sd2.pdf]

**A**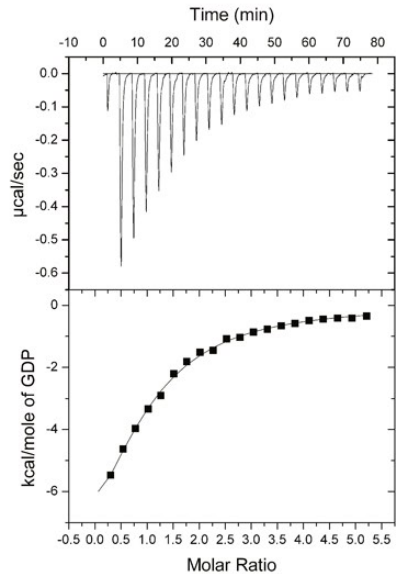**B**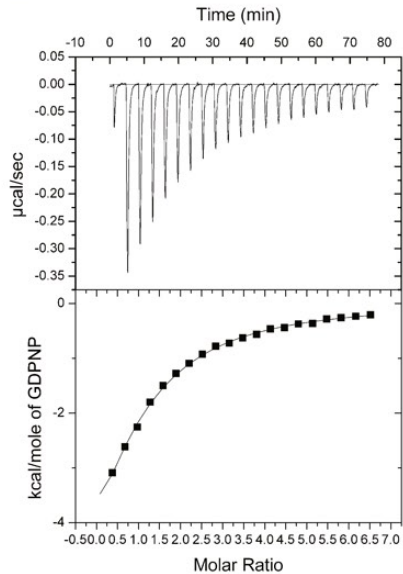**C**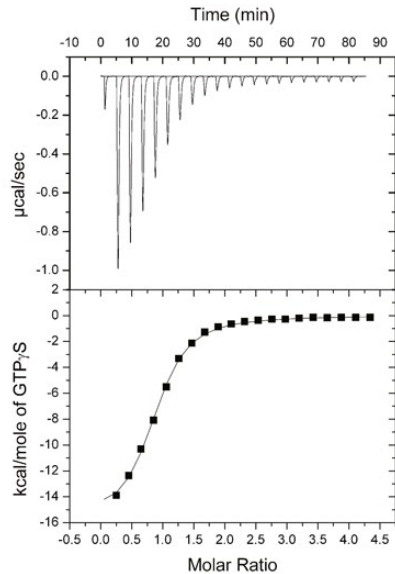

Supplement: embj0033-2547-sd3.pdf [file embj0033-2547-sd3.pdf]

A

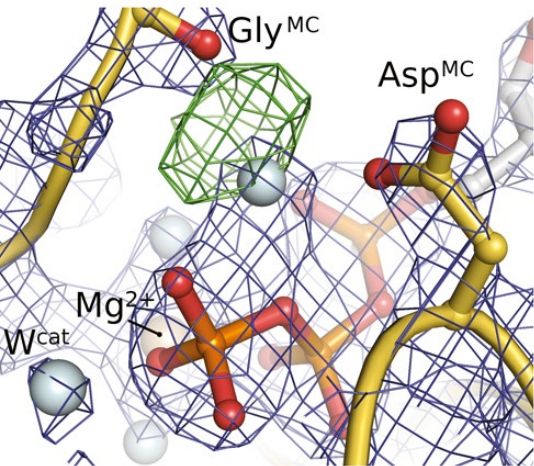

B

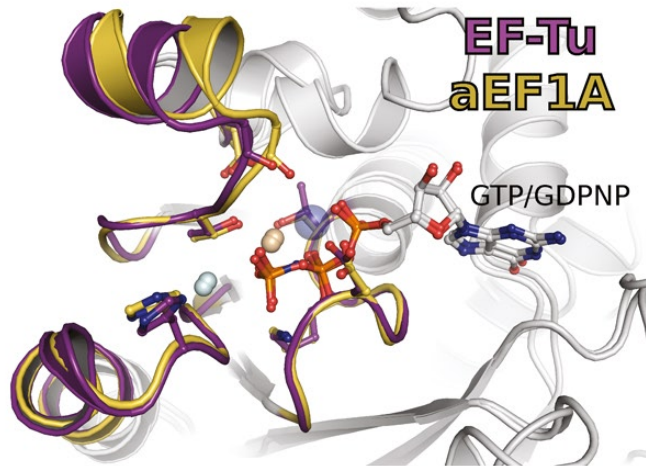

C

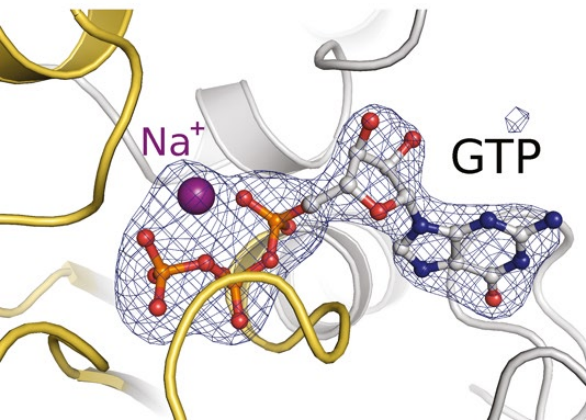

D

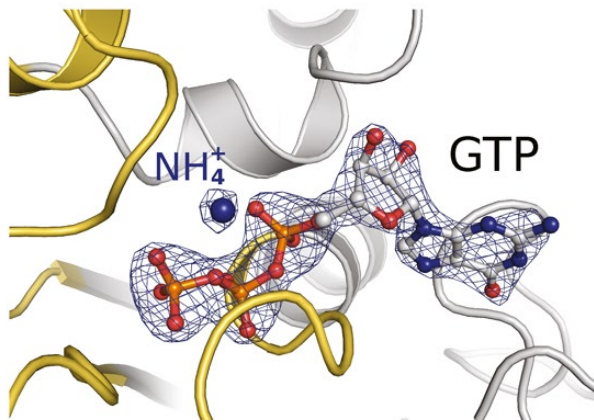

Supplement: embj0033-2547-sd4.pdf [file embj0033-2547-sd4.pdf]

**A**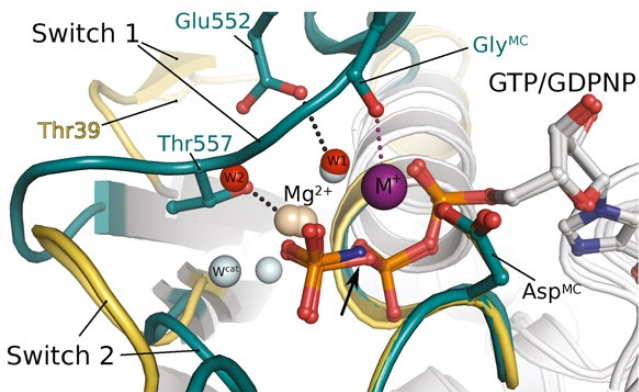**B**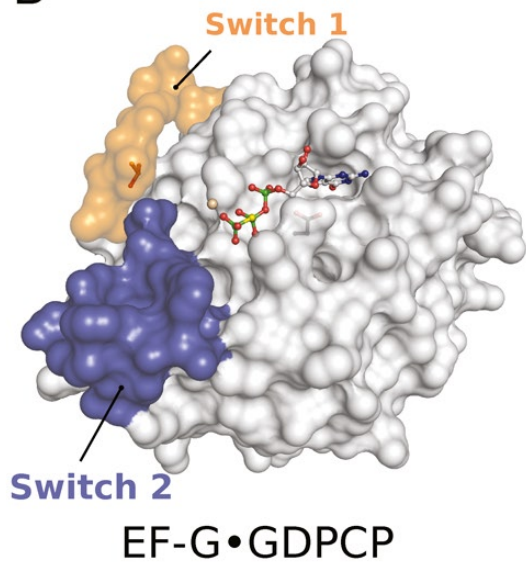**C**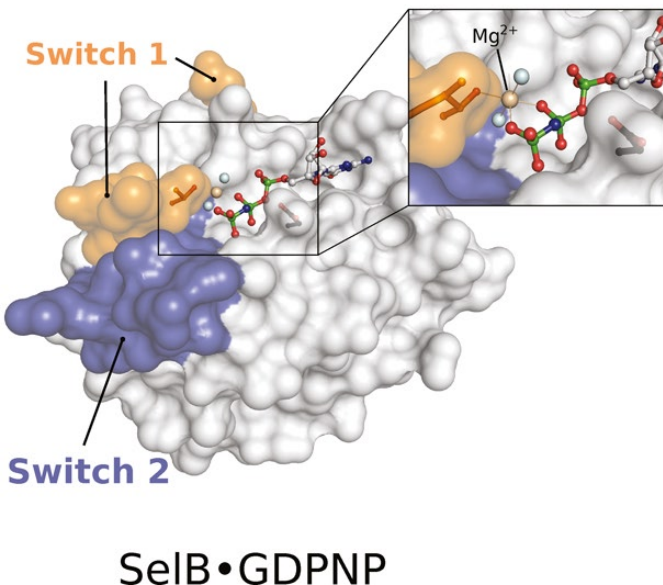**D**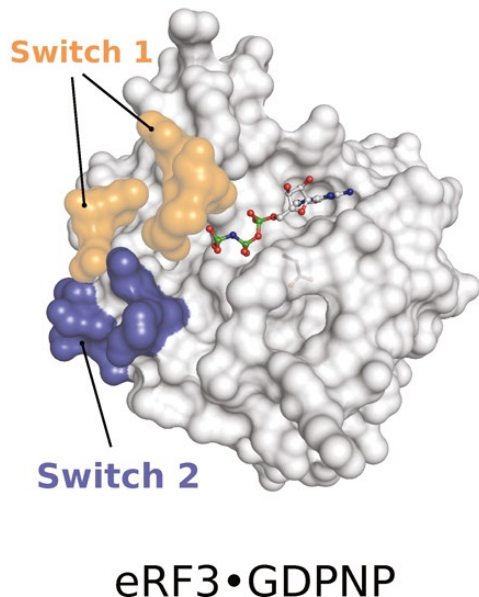

Supplement: embj0033-2547-sd5.pdf [file embj0033-2547-sd5.pdf]

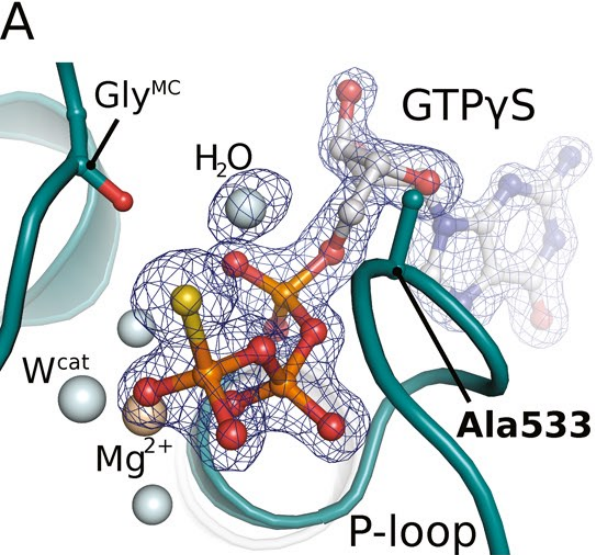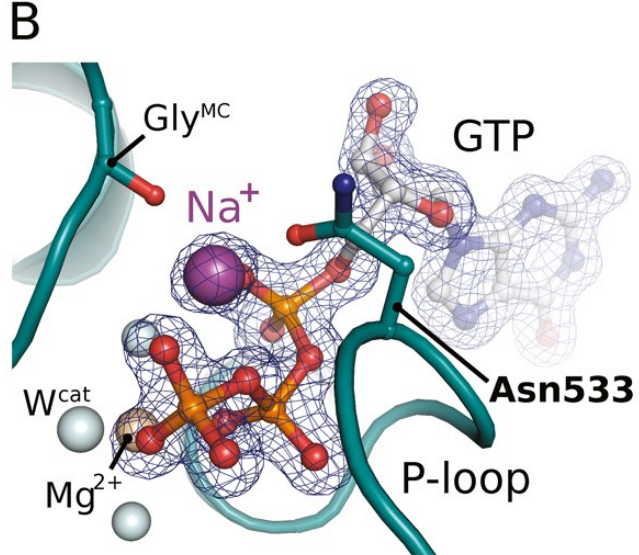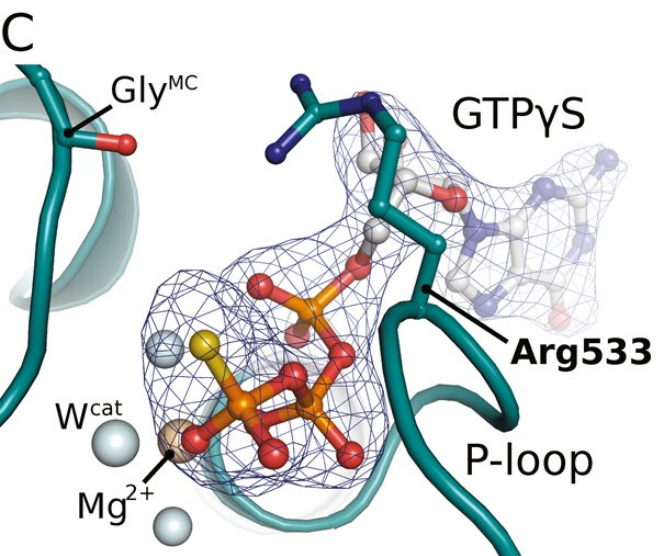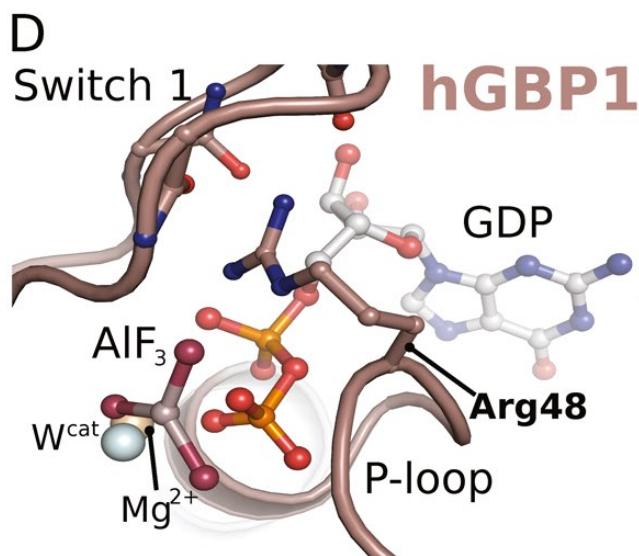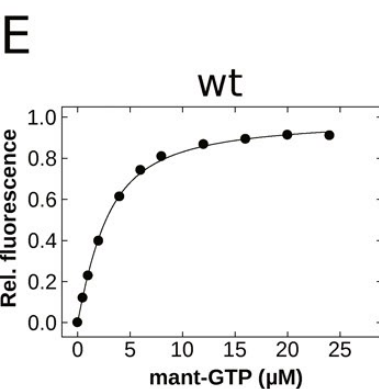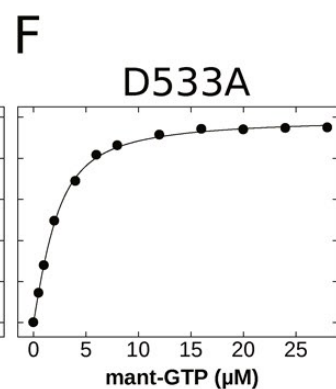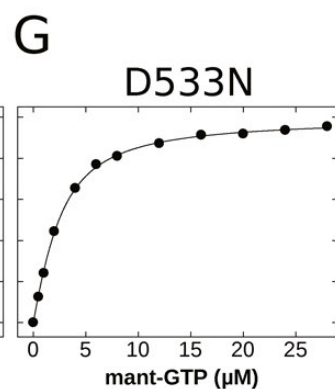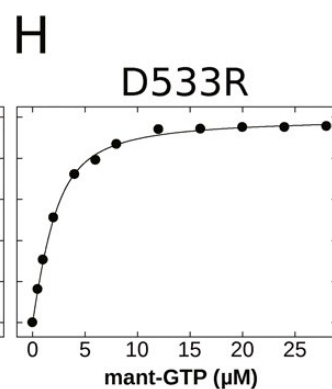

Supplement: embj0033-2547-sd6.pdf [file embj0033-2547-sd6.pdf]

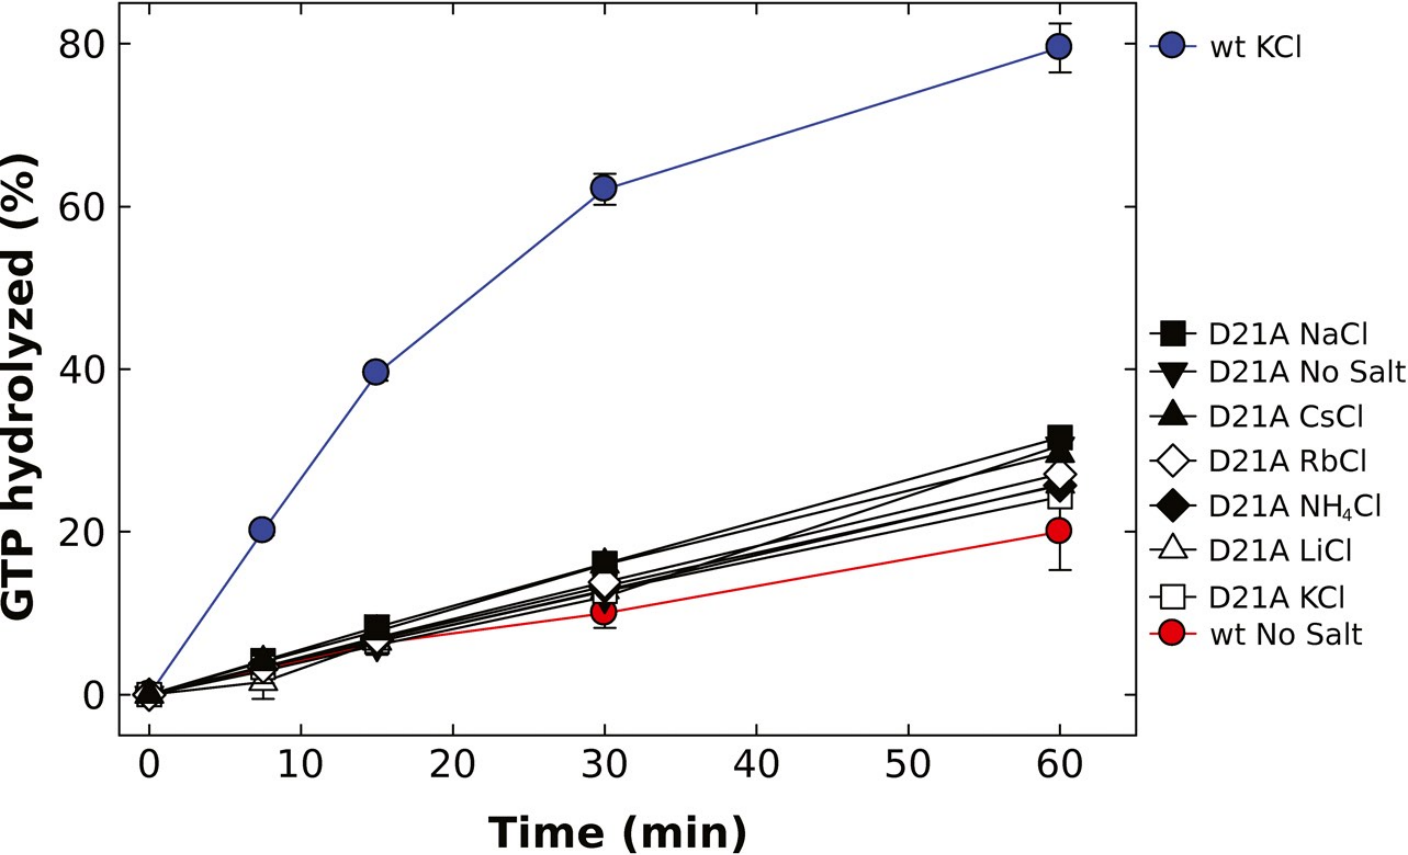

Supplement: embj0033-2547-sd7.pdf [file embj0033-2547-sd7.pdf]
